1 **Title:** Etiologies of bloody diarrhea in children presenting with acute gastroenteritis to US  
2 emergency departments

3  
4 Paola Fonseca-Romero<sup>1,2</sup>, Sharia M. Ahmed Ph.D<sup>2</sup>, Ben J. Brintz Ph.D<sup>2</sup>, D. Matthew Vierkant<sup>2</sup>,  
5 Jennifer Dien Bard Ph.D<sup>3</sup>, Daniel M. Cohen MD<sup>5</sup>, Ara Festekjian MD, MS<sup>3</sup>, Amy L. Leber PhD<sup>5</sup>,  
6 Jami T. Jackson DO<sup>6</sup>, Neena Kanwar Ph.D, MVSc<sup>6</sup>, Chari Larsen MD<sup>4</sup>, Rangaraj Selvarangan  
7 Ph.D<sup>6</sup>, Kimberle C. Chapin<sup>7,8</sup>, Andrew T. Pavia MD<sup>2,4</sup>, and Daniel T. Leung MD, MSc.<sup>1,2</sup> On  
8 behalf of IMPACT study investigators

9  
10 Author Affiliations:

11 <sup>1</sup>Department of Pathology, Spencer Fox Eccles School of Medicine, University of Utah, Salt  
12 Lake City, UT, USA

13 <sup>2</sup>Department of Internal Medicine, Spencer Fox Eccles School of Medicine, University of Utah,  
14 Salt Lake City, UT, USA

15 <sup>3</sup>Children's Hospital, Los Angeles; Keck School of Medicine, University of Southern California,  
16 Los Angeles, CA, US

17 <sup>4</sup>Department of Pediatrics, Spencer Fox Eccles School of Medicine, University of Utah, Salt  
18 Lake City, UT, USA

19 <sup>5</sup>Department of Pediatrics, Nationwide Children's Hospital, Columbus, OH, USA

20 <sup>6</sup>Children's Mercy Hospital, Kansas City, MO, USA

21 <sup>7</sup>Deepull, Barcelona, Spain

22  
23 <sup>8</sup>Warren Alpert Medical School, Brown University, Providence, RI, USA

24  
25 **Abstract:**

26  
27 Among 111 children presenting with bloody diarrhea in a multicenter study of molecular testing  
28 in US emergency departments, we found viral pathogens in 18%, bacteria in 48%, protozoa in  
29 2%, and no pathogens detected in 38%.

30

31 Keywords: Gastroenteritis, bloody diarrhea, antibiotic, multiplex panel, pediatric

32 **Introduction:**

33 Diarrheal diseases continue to be the leading cause of death globally in children under five, with  
34 an estimated 1.7 billion cases and 525,000 deaths every year[1]. In the United States alone,  
35 diarrheal illness accounts for 178.8 million cases, resulting in 474,000 hospitalizations and  
36 5,000 deaths each year[2,3]. Bloody diarrhea, or hematochezia associated with a diarrheal  
37 illness, arises from intestinal inflammation[4] and may be accompanied by dehydration, fever,  
38 and abdominal pain. Bloody diarrhea can lead to substantial healthcare utilization and medical  
39 costs [5,6]. Despite this, our knowledge of the causes of bloody diarrhea is limited mainly to  
40 single-center studies, many of which were from the pre-molecular era.

41 Bloody diarrhea is often associated with *Shigella spp* and other invasive enteropathogens such  
42 as *Shiga-toxin producing E. coli (STEC)*, *Salmonella spp*, *Campylobacter spp*, and *Yersinia*  
43 *spp*[5,7–10]. However, recent studies have shown that many cases of bloody diarrhea cannot  
44 be attributed to only bacteria, that STEC only accounts for a minority of cases, and in many  
45 cases, infectious etiology cannot be determined[4,11]. The Infectious Disease Society of  
46 America (IDSA) guidelines recommend that patients presenting with fever or bloody stool be  
47 evaluated for enteropathogens, for which antimicrobial agents may be clinically beneficial[12].  
48 Historically, given the long turnaround time of stool culture, the use of antibiotics in cases of  
49 bloody diarrhea has been empiric. However, overuse of antimicrobials is associated with  
50 adverse medication effects and hemolytic-uremic syndrome (HUS) in STEC infection[13], and  
51 on the population level, may lead to the development of antimicrobial resistance. In one US  
52 study, 13% of children with acute gastroenteritis were prescribed antibiotics at outpatient visits  
53 [14]. Knowledge of etiologies in children with bloody diarrhea may improve the appropriate use  
54 of antibiotics and diagnostics. Therefore, our primary objective in this study was to determine  
55 the etiological agents responsible for bloody diarrhea in children.

56 **Methods:**

57 **Study Design and Setting:** We performed a secondary analysis of data collected as part of a  
58 pragmatic stepped wedge study of the impact of multiplex PCR testing (BioFire FilmArray GI  
59 Panel, bioMerieux, Salt Lake City, Utah), which tests for 22 pathogens: 5 viruses, 13 bacteria,  
60 and 4 protozoa in five US pediatric emergency departments, also known as the Implementation  
61 of Molecular Diagnostic for Pediatric Acute Gastroenteritis study (IMPACT)[15], conducted from  
62 April 2015 to September 2016 (Supplemental Figure 1). Written informed consent was obtained  
63 from parents or legal guardians, and children provided age-appropriate assent. The trained  
64 study coordinator administered a questionnaire on symptoms, medical history, treatment,  
65 demographics, and epidemiologic exposures of children presenting with gastroenteritis. During  
66 the visit or within 48 hours, we asked all children to provide a stool sample for PCR multiplex  
67 testing.

68 **Eligibility:** Patients eligible were < 18 years old with symptoms of gastroenteritis (diarrhea,  
69 vomiting, abdominal pain) and presented to the ED or on-site urgent care center. The IMPACT  
70 study had 1157 eligible patients (Supplemental Figure 2). Excluding 137 patients who did not  
71 have diarrhea or whose status was unknown, among the 1020 patients who reported diarrhea,  
72 we included 126 (12.3%) who reported bloody diarrhea in this analysis.

73

74 **Etiological Outcomes:** We considered multiple pathogens detected in a single sample as co-  
75 infections. In this analysis, we did not consider enteropathogenic *E. coli* (EPEC) in children of  
76 any age and *C. difficile* in children  $\leq 2$  years of age given that they are of unclear clinical  
77 significance.

78

79 **Statistical analysis:** We conducted data processing and analyses utilizing R version 3.6.2. We  
80 compiled frequency tables for the overall prevalence of bloody diarrhea across age groups. We  
81 calculated odds ratios (OR) and confidence intervals (CI) in two distinct populations (bloody and  
82 non-bloody diarrheal cases) to assess the association between the presence of a pathogen and  
83 the likelihood of experiencing bloody diarrhea. In addition, we calculated OR adjusted by age  
84 group.

85 **Results:**

86 Among 1020 patients <18 years old with diarrhea, 126 (12%) of children or their caregivers  
87 reported bloody diarrhea (Supplemental Figure 2). PCR was performed on the stool samples of  
88 111 (88%) cases of bloody diarrhea, of which 69 (62%) had at least one pathogen detected  
89 (Table 1 and Supplemental Figure 2). Among the 111 children with bloody diarrhea and PCR  
90 performed, we detected viruses in 20 (18%) of children, bacteria in 53 (48%), and protozoa  
91 (*Giardia* only) in 2 (2%). Two or more pathogens was detected in 22 children. Pathogens  
92 typically seen with bloody diarrhea, including *Campylobacter*, *C. difficile*, STEC, and *Shigella*,  
93 were collectively detected in 51 (46%). No pathogens were identified in 42 (38%) of children. In  
94 cases where only one pathogen was identified, we identified 32 (67%) with bacteria detected,  
95 14 (29%) with viruses, and 2 (4%) with protozoa (Supplemental Table 3)

96 We conducted an odds ratio analysis to evaluate the magnitude of the association between the  
97 presence of pathogen and the occurrence of bloody diarrhea (Table 2), comparing patients with  
98 bloody diarrhea (n = 111), and those with non-bloody diarrhea (n=731). We found the odds of  
99 having bloody diarrhea are 9.4 times higher in individuals with STEC detected compared to  
100 those without (unadjusted OR: 9.4, 95% confidence interval [CI]: 4.1,21). After adjusting for age,  
101 the odds remain substantially elevated, with an adjusted OR of 8.9(95% CI:3.9,21). Similarly, for  
102 *Campylobacter*, the odds ratio was 4.3 (95% CI: 1.6,10.4). In contrast, sapovirus, astrovirus,  
103 and norovirus had lower odds of bloody diarrhea although the confidence interval excluded 1  
104 only for norovirus and sapovirus. Of the 14 children with bloody diarrhea who received  
105 antibiotics during or after their ED visit (*Supplemental Table 4*), 6 (43%) did not have a  
106 pathogen for which antibiotics would have been indicated; 3 patients had no pathogen detected,  
107 1 had *Salmonella* detected in a non-infant, and 2 had STEC detected, for which antibiotics are  
108 potentially harmful.

109

110 **Discussion:**

111 Bloody diarrhea is thought to be a sign of invasive enteric infection that carries the risk of severe  
112 morbidity and mortality among children[4,10]. Our analysis of data from a multi-site study  
113 revealed that in less than half of the cases with bloody diarrhea was a bacterial pathogen  
114 typically associated with this condition detected, and that in a substantial proportion (over a  
115 third) of bloody diarrhea cases, a pathogen was detected for which antibiotics was not indicated.  
116 Prior studies of bloody diarrhea in children, before the widespread availability of multiplex PCR,  
117 had been limited to conventional stool culture, immunoassays, and a limited array of PCR  
118 detection methods[5,7,8]. Our findings align with more contemporary multiplex PCR-based  
119 studies of either bloody diarrhea, or more generally hematochezia, emphasizing the complexity  
120 of attributing bloody diarrhea symptoms to specific pathogens[4]. In our study, 13% (14/111) of  
121 children with bloody diarrhea had only viral detection, consistent with prior studies [4,11]. We  
122 also did not identify any pathogens in 38% of the patients, suggesting that a portion of bloody  
123 diarrhea cases could be attributed to non-infectious causes or some other pathogens causing  
124 gastrointestinal symptoms that the multiplex PCR panel may not cover. In addition, we found  
125 that 43% of patients with bloody diarrhea who received antibiotics during or after the ED visit did  
126 not have detection of a pathogen for which an antibiotic would be indicated. These findings  
127 support the need for use of stool testing in patients with bloody diarrhea to determine antibiotic  
128 use, instead of relying on empiric therapy.

129 While symptom-based empiric determination is insufficient to identify patients who would benefit  
130 from antibiotics, further work is also needed to improve the utility of diagnostic testing. Molecular  
131 testing such as multiplex PCR is an important improvement from traditional stool culture, with  
132 increased sensitivity for pathogen detection as well as faster turnaround time. However,  
133 molecular testing is expensive in high resource settings and may have very low availability in

134 lower resource settings. Our data support its utility in bloody diarrhea, but more work is needed  
135 to identify strategies for optimal stewardship of this resource.

136 While our study provides valuable insights into the etiologies associated with bloody diarrhea in  
137 children presenting to emergency departments in the US, several limitations warrant  
138 consideration. The lack of control groups of non-diarrheal patients limits the ability to draw  
139 definitive conclusions about causation between identified pathogens and bloody diarrhea.  
140 Second, in one of the five sites, a *Shigella* outbreak occurred during the study, which could lead  
141 to this pathogen being over-represented in our study. Third, our study only included patients  
142 presenting to emergency departments, and thus may represent more severe cases, restricting  
143 the generalizability of our findings. Despite these limitations, the study underscores the need for  
144 comprehensive testing and improved data collection strategies to improve antibiotic stewardship  
145 and patient care.

146  
147 In conclusion, of the 12% (126/1020) of participants in this study of children presenting to US-  
148 based emergency rooms with acute diarrhea who reported bloody diarrhea, fewer than half of  
149 cases had etiologies for which antibiotics are indicated. Recognizing the heterogeneity of  
150 etiological agents in bloody diarrhea is crucial for the appropriate management of diarrheal  
151 illness in children.

152



153 **References**

- 154 1. Troeger C, Blacker BF, Khalil IA, et al. Estimates of the global, regional, and  
155 national morbidity, mortality, and aetiologies of diarrhoea in 195 countries: a  
156 systematic analysis for the Global Burden of Disease Study 2016. Published online  
157 2018. doi:10.1016/S1473-3099(18)30362-1
- 158 2. UNICEF. Diarrhea remains a leading killer of young children, despite the  
159 availability of simple treatment solution. [UNICEF.org/child-health/ diarrheal](https://www.unicef.org/child-health/diarrheal-disease.html)  
160 [disease.html](https://www.unicef.org/child-health/diarrheal-disease.html).
- 161 3. Scallan E, Mahon BE, Hoekstra RM, Griffin PM. Estimates of illnesses,  
162 hospitalizations and deaths caused by major bacterial enteric pathogens in young  
163 children in the United States. *Pediatr Infect Dis J.* 2013;32(3):217-221.  
164 doi:10.1097/INF.0B013E31827CA763
- 165 4. Böhler M, Fitzpatrick E, Hurley K, et al. Hematochezia in children with acute  
166 diarrhea seeking emergency department care - a prospective cohort study. *Acad*  
167 *Emerg Med.* 2022;29(4):429-441. doi:10.1111/ACEM.14434
- 168 5. Xie J, Kim K, Berenger BM, et al. Comparison of a Rapid Multiplex Gastrointestinal  
169 Panel with Standard Laboratory Testing in the Management of Children with  
170 Hematochezia in a Pediatric Emergency Department: Randomized Controlled  
171 Trial. *Microbiol Spectr.* 2023;11(3). doi:10.1128/SPECTRUM.00268-23
- 172 6. Buchwald AG, Verani JR, Keita AM, et al. Etiology, Presentation, and Risk Factors  
173 for Diarrheal Syndromes in 3 Sub-Saharan African Countries After the Introduction  
174 of Rotavirus Vaccines From the Vaccine Impact on Diarrhea in Africa (VIDA)  
175 Study. *Clinical Infectious Diseases.* 2023;76(Supplement\_1):S12-S22.  
176 doi:10.1093/CID/CIAD022
- 177 7. Buss SN, Leber A, Chapin K, et al. Multicenter Evaluation of the BioFire FilmArray  
178 Gastrointestinal Panel for Etiologic Diagnosis of Infectious Gastroenteritis. *J Clin*  
179 *Microbiol.* 2015;53(3):915. doi:10.1128/JCM.02674-14
- 180 8. Stockmann C, Pavia AT, Graham B, et al. Detection of 23 Gastrointestinal  
181 Pathogens Among Children Who Present With Diarrhea. *J Pediatric Infect Dis Soc.*  
182 2017;6(3):231-238. doi:10.1093/JPIDS/PIW020
- 183 9. Talan DA, Moran GJ, Newdow M, et al. Etiology of Bloody Diarrhea among  
184 Patients Presenting to United States Emergency Departments: Prevalence of  
185 *Escherichia coli* O157:H7 and Other Enteropathogens. *Clinical Infectious*  
186 *Diseases.* 2001;573:573-580.
- 187 10. Denno DM, Shaikh N, Stapp JR, et al. Diarrhea Etiology in a Pediatric Emergency  
188 Department: A Case Control Study. *Clin Infect Dis.* 2012;55(7):897.  
189 doi:10.1093/CID/CIS553
- 190 11. Klein EJ, Boster DR, Stapp JR, et al. Diarrhea etiology in a Children's Hospital  
191 Emergency Department: a prospective cohort study. *Clin Infect Dis.*  
192 2006;43(7):807-813. doi:10.1086/507335

- 193 12. Shane AL, Mody RK, Crump JA, et al. 2017 Infectious Diseases Society of  
194 America Clinical Practice Guidelines for the Diagnosis and Management of  
195 Infectious Diarrhea. *Clinical Infectious Diseases*. 2017;65(12):e45-e80.  
196 doi:10.1093/cid/cix669
- 197 13. SB F, J X, MS N, et al. Shiga Toxin-Producing Escherichia coli Infection,  
198 Antibiotics, and Risk of Developing Hemolytic Uremic Syndrome: A Meta-analysis.  
199 *Clin Infect Dis*. 2016;62(10):1251-1258. doi:10.1093/CID/CIW099
- 200 14. Collins JP, King LM, Collier SA, et al. Antibiotic prescribing for acute gastroenteritis  
201 during ambulatory care visits-United States, 2006-2015. *Infect Control Hosp*  
202 *Epidemiol*. 2022;43(12):1880-1889. doi:10.1017/ICE.2021.522
- 203 15. Pavia AT, Cohen DM, Leber AL, et al. Clinical Impact of Multiplex Molecular  
204 Diagnostic Testing in Children with Acute Gastroenteritis Presenting to An  
205 Emergency Department: A Multicenter Prospective Study. *medRxiv*. Published  
206 online July 31, 2023:2023.07.27.23293208. doi:10.1101/2023.07.27.23293208

207

208

209

210

211

212

213

214

215

216

217

218 Table. 1: Frequency of detection for the 21 pathogens in the PCR panel, among patients  
 219 presenting with bloody diarrhea, stratified by age group. Co-occurring pathogens are listed  
 220 multiple times. Abbreviations: ETEC, Enterotoxigenic *E. coli*; EAEC, Enteroaggregative *E. coli*;  
 221 STEC, Shigatoxin-producing *E. coli*; O157, *E. coli* O157

| Pathogen                    | <6 months<br>(n=12) | 6-23<br>months<br>(n=23) | 2-4 years<br>(n=19) | 5-11 years<br>(n=34) | 12-17 years<br>(n =23) | Total (n =111) |
|-----------------------------|---------------------|--------------------------|---------------------|----------------------|------------------------|----------------|
| <b>Bacteria</b>             |                     |                          |                     |                      |                        | <b>n = 53</b>  |
| <i>Campylobacter</i>        | 0 (0%)              | 2 (9%)                   | 4 (21%)             | 1 (3%)               | 1 (4%)                 | 8 (7%)         |
| <i>C. difficile</i>         | 0 (0%)              | 0 (0%)                   | 3 (16%)             | 3 (9%)               | 3 (12%)                | 9 (8%)         |
| ETEC                        | 0 (0%)              | 0 (0%)                   | 1 (5%)              | 3 (9%)               | 0 (0%)                 | 4 (3.6%)       |
| EAEC                        | 0 (0%)              | 1 (4%)                   | 2 (11%)             | 7 (21%)              | 0 (0%)                 | 10 (9%)        |
| <i>Salmonella</i>           | 2 (17%)             | 0 (0%)                   | 1 (5%)              | 3 (9%)               | 0 (0%)                 | 6 (5.4%)       |
| <i>P. shigelloides</i>      | 0 (0%)              | 0 (0%)                   | 0 (0%)              | 0 (0%)               | 1 (4%)                 | 1 (0.9%)       |
| <i>Vibrio</i>               | 0 (0%)              | 0 (0%)                   | 0 (0%)              | 0 (0%)               | 0 (0%)                 | 0 (0%)         |
| STEC                        | 0 (0%)              | 3 (39%)                  | 2 (11%)             | 4 (12%)              | 5 (22%)                | 14 (13%)       |
| O157                        | 0 (0%)              | 1 (4%)                   | 1 (5%)              | 1 (3%)               | 2 (9%)                 | 5 (4.5%)       |
| Non-O157                    | 0 (0%)              | 2 (9%)                   | 1 (5%)              | 3 (9%)               | 3 (12%)                | 9 (8%)         |
| <i>Shigella</i> /EIEC       | 0 (0%)              | 2 (9%)                   | 2 (11%)             | 10 (29%)             | 1 (4%)                 | 15 (14%)       |
| <i>Y. enterocolitica</i>    | 0 (0%)              | 0 (0%)                   | 0 (0%)              | 0 (0%)               | 0 (0%)                 | 0 (0%)         |
| <i>V. cholerae</i>          | 0 (0%)              | 0 (0%)                   | 0 (0%)              | 0 (0%)               | 0 (0%)                 | 0 (0%)         |
| <b>Viruses</b>              |                     |                          |                     |                      |                        | <b>n = 20</b>  |
| Adenovirus. F               | 0 (0%)              | 0 (0%)                   | 0 (0%)              | 0 (0%)               | 0 (0%)                 | 0 (0%)         |
| Astrovirus                  | 1 (8%)              | 2 (9%)                   | 1 (5%)              | 0 (0%)               | 0 (0%)                 | 4 (3.6%)       |
| Norovirus                   | 1 (8%)              | 1 (4%)                   | 0 (0%)              | 1 (3%)               | 2 (9%)                 | 5 (4.5%)       |
| Sapovirus                   | 1 (8%)              | 4 (17%)                  | 1 (5%)              | 0 (0%)               | 0 (0%)                 | 6 (5.4%)       |
| Rotavirus. A                | 4 (33%)             | 1 (4%)                   | 0 (0%)              | 0 (0%)               | 0 (0%)                 | 5 (4.5%)       |
| <b>Protozoa</b>             |                     |                          |                     |                      |                        | <b>n = 2</b>   |
| <i>Giardia</i>              | 0 (0%)              | 0 (0%)                   | 1 (5%)              | 1 (3%)               | 0 (0%)                 | 2 (1.8%)       |
| <i>Cryptosporidium</i>      | 0 (0%)              | 0 (0%)                   | 0 (0%)              | 0 (0%)               | 0 (0%)                 | 0 (0%)         |
| <i>Cyclospora</i>           | 0 (0%)              | 0 (0%)                   | 0 (0%)              | 0 (0%)               | 0 (0%)                 | 0 (0%)         |
| <i>E. histolytica</i>       | 0 (0%)              | 0 (0%)                   | 0 (0%)              | 0 (0%)               | 0 (0%)                 | 0 (0%)         |
| <b>No pathogen detected</b> | 4 (33%)             | 11 (48%)                 | 5 (26%)             | 10 (29%)             | 12 (52%)               | 42 (38%)       |

222 **Footnote:** There was no detection of *Vibrio spp*, *V. cholerae*, *E. histolytica*, *Y. enterocolitica*,  
 223 Adenovirus F 40/41, *C. cayetanensis*, and *Cryptosporidium*.

224 Table. 2: Unadjusted and age group-adjusted Odds Ratios (OR) of the association between the  
 225 presence of pathogen and the occurrence of bloody diarrhea. Abbreviations: CI, confidence  
 226 interval; OR odds ratio; Unadj, unadjusted; Adjust, adjusted

| Pathogen <sup>a</sup>    | Bloody Diarrhea with PCR (n = 111) | Non-Bloody Diarrhea with PCR (n = 731) | Unadj. OR (95% CI) | Adjust. OR <sup>c</sup> 95%CI |
|--------------------------|------------------------------------|----------------------------------------|--------------------|-------------------------------|
| STEC                     | 14 (13%)                           | 11 (1.5%)                              | 9.4 (4.1, 21.8)    | 8.9 (3.9,21)                  |
| <i>O157</i>              | 5 (4.5%)                           | 1 (0.1%)                               | 34.4 (5.4, 663.1)  | 30.0 (4.6, 574.7)             |
| Non-O157                 | 9 (8.1%)                           | 10 (1.4%)                              | 6.4 (2.5,16)       | 6.3 (2.4,16)                  |
| <i>P. shigelloides</i>   | 1 (0.9%)                           | 1 (0.1%)                               | 6.6 (0.3,168.6)    | 5.0 (0.18,127.7)              |
| <i>Campylobacter</i>     | 8 (7.2%)                           | 13 (1.8%)                              | 4.3 (1.6,10.4)     | 4.0 (1.4,9.5)                 |
| <i>C. difficile</i>      | 9 (8.1%)                           | 29 (4.0%)                              | 3.8 (1.4,9.5)      | 2.0 (0.6,3.3)                 |
| <i>ETEC</i>              | 4 (3.6%)                           | 9 (1.2%)                               | 2.9 (0.8, 9.3)     | 2.8 (0.8,9.0)                 |
| <i>Shigella</i> /EIEC    | 15 (14%)                           | 39 (5.3%)                              | 2.7 (1.4,5.1)      | 2.4 (1.2,4.6)                 |
| <i>Salmonella</i>        | 6 (5.4)                            | 22 (3.0%)                              | 1.8 (0.6, 4.3)     | 1.6 (0.5,3.9)                 |
| EAEC                     | 10 (9.0%)                          | 42 (5.7)                               | 1.6 (0.7, 3.2)     | 1.7 (0.8,3.5)                 |
| Rotavirus A              | 5 (4.5%)                           | 23 (3.1%)                              | 1.4 (0.47, 3.6)    | 2.0 (0.6,5.2)                 |
| <i>G. lamblia</i>        | 2 (1.8%)                           | 14 (1.9%)                              | 0.93 (0.1,3.4)     | 0.8 (0.1,3.1)                 |
| Astrovirus               | 4 (3.6%)                           | 38 (5.2%)                              | 0.7 (0.2 1.7)      | 0.8 (0.2,2.0)                 |
| Sapovirus                | 6 (5.4%)                           | 82 (11%)                               | 0.5 (0.17, 0.99)   | 0.5 (0.2,1.1)                 |
| Norovirus                | 5 (4.5%)                           | 176 (24%)                              | 0.14 (0.05, 0.34)  | 0.2 (0.05,0.3)                |
| Adenovirus F             | 0 (0%)                             | 92 (13%)                               | <sup>b</sup>       | <sup>b</sup>                  |
| <i>Cryptosporidium</i>   | 0 (0%)                             | 23 (3.1%)                              | <sup>b</sup>       | <sup>b</sup>                  |
| <i>Y. enterocolitica</i> | 0 (0%)                             | 2 (0.3%)                               | <sup>b</sup>       | <sup>b</sup>                  |

227

228

229 **Footnote:**

230 <sup>a</sup> No detection of *Vibrio spp.*, *V. cholerae*, *E. histolytica*, *C. cayetanensis* in either group.

231 <sup>b</sup> No detection of Adenovirus F, *Y. enterocolitica*, and *Cryptosporidium* in cases of bloody  
232 diarrhea.

233 <sup>c</sup> Odds ratio adjusted by age category

234

235

236

237 **Acknowledgments.**

238

239 We thank all the field support staff who participated in this project. This study was partly funded  
240 by grants from the NIH (R01AI135114 and K24166087 to DTL). The IMPACT study was  
241 supported by the NIH with additional funding from BioFire Diagnostics (now bioMerieux).

242 This research was supported by the National Institutes of Health under Ruth L. Kirschstein  
243 National Research Service Award NIH Award Number 1T32TR00432

244

245 **Potential conflicts of interest.**

246 A.L.L reports funding that goes to institution from BioMerieux, Cepheid and Diasorin. All other  
247 authors report no potential conflict of interest.

248

249
